# Supplementary material
Source: PubMed Central journal article supplement (PMC4845936)
Supplement: kccy-15-05-1147631-s001.pdf [file kccy-15-05-1147631-s001.pdf]

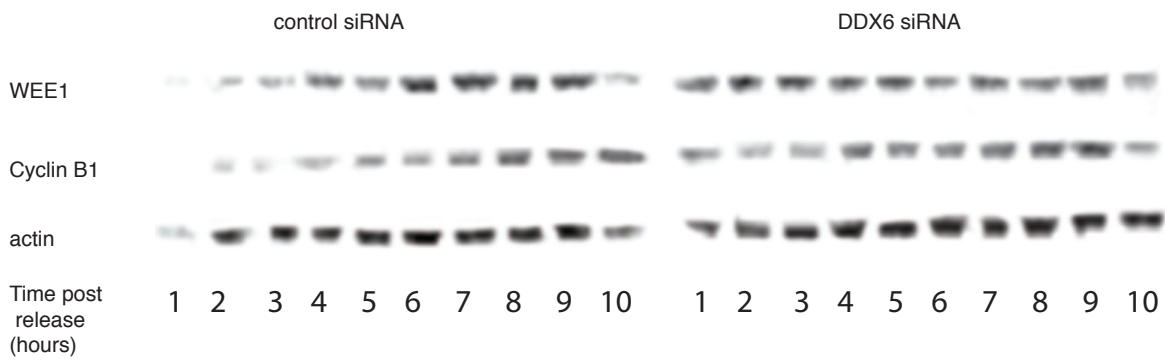

Figure S7. Differential expression of WEE1 along the cell cycle is dependent on DDX6. HeLa cells were transfected with control SiRNA and DDX6 SiRNA, Cells were synchronized by double thymidin block. Western blot analyses of WEE1 and cyclin B1 expression were performed at each hour after release from the double thymidine block!
