# Supplementary material
Source: PubMed Central journal article supplement (PMC4845936)
Supplement: kccy-15-05-1147631-s002.pdf [file kccy-15-05-1147631-s002.pdf]

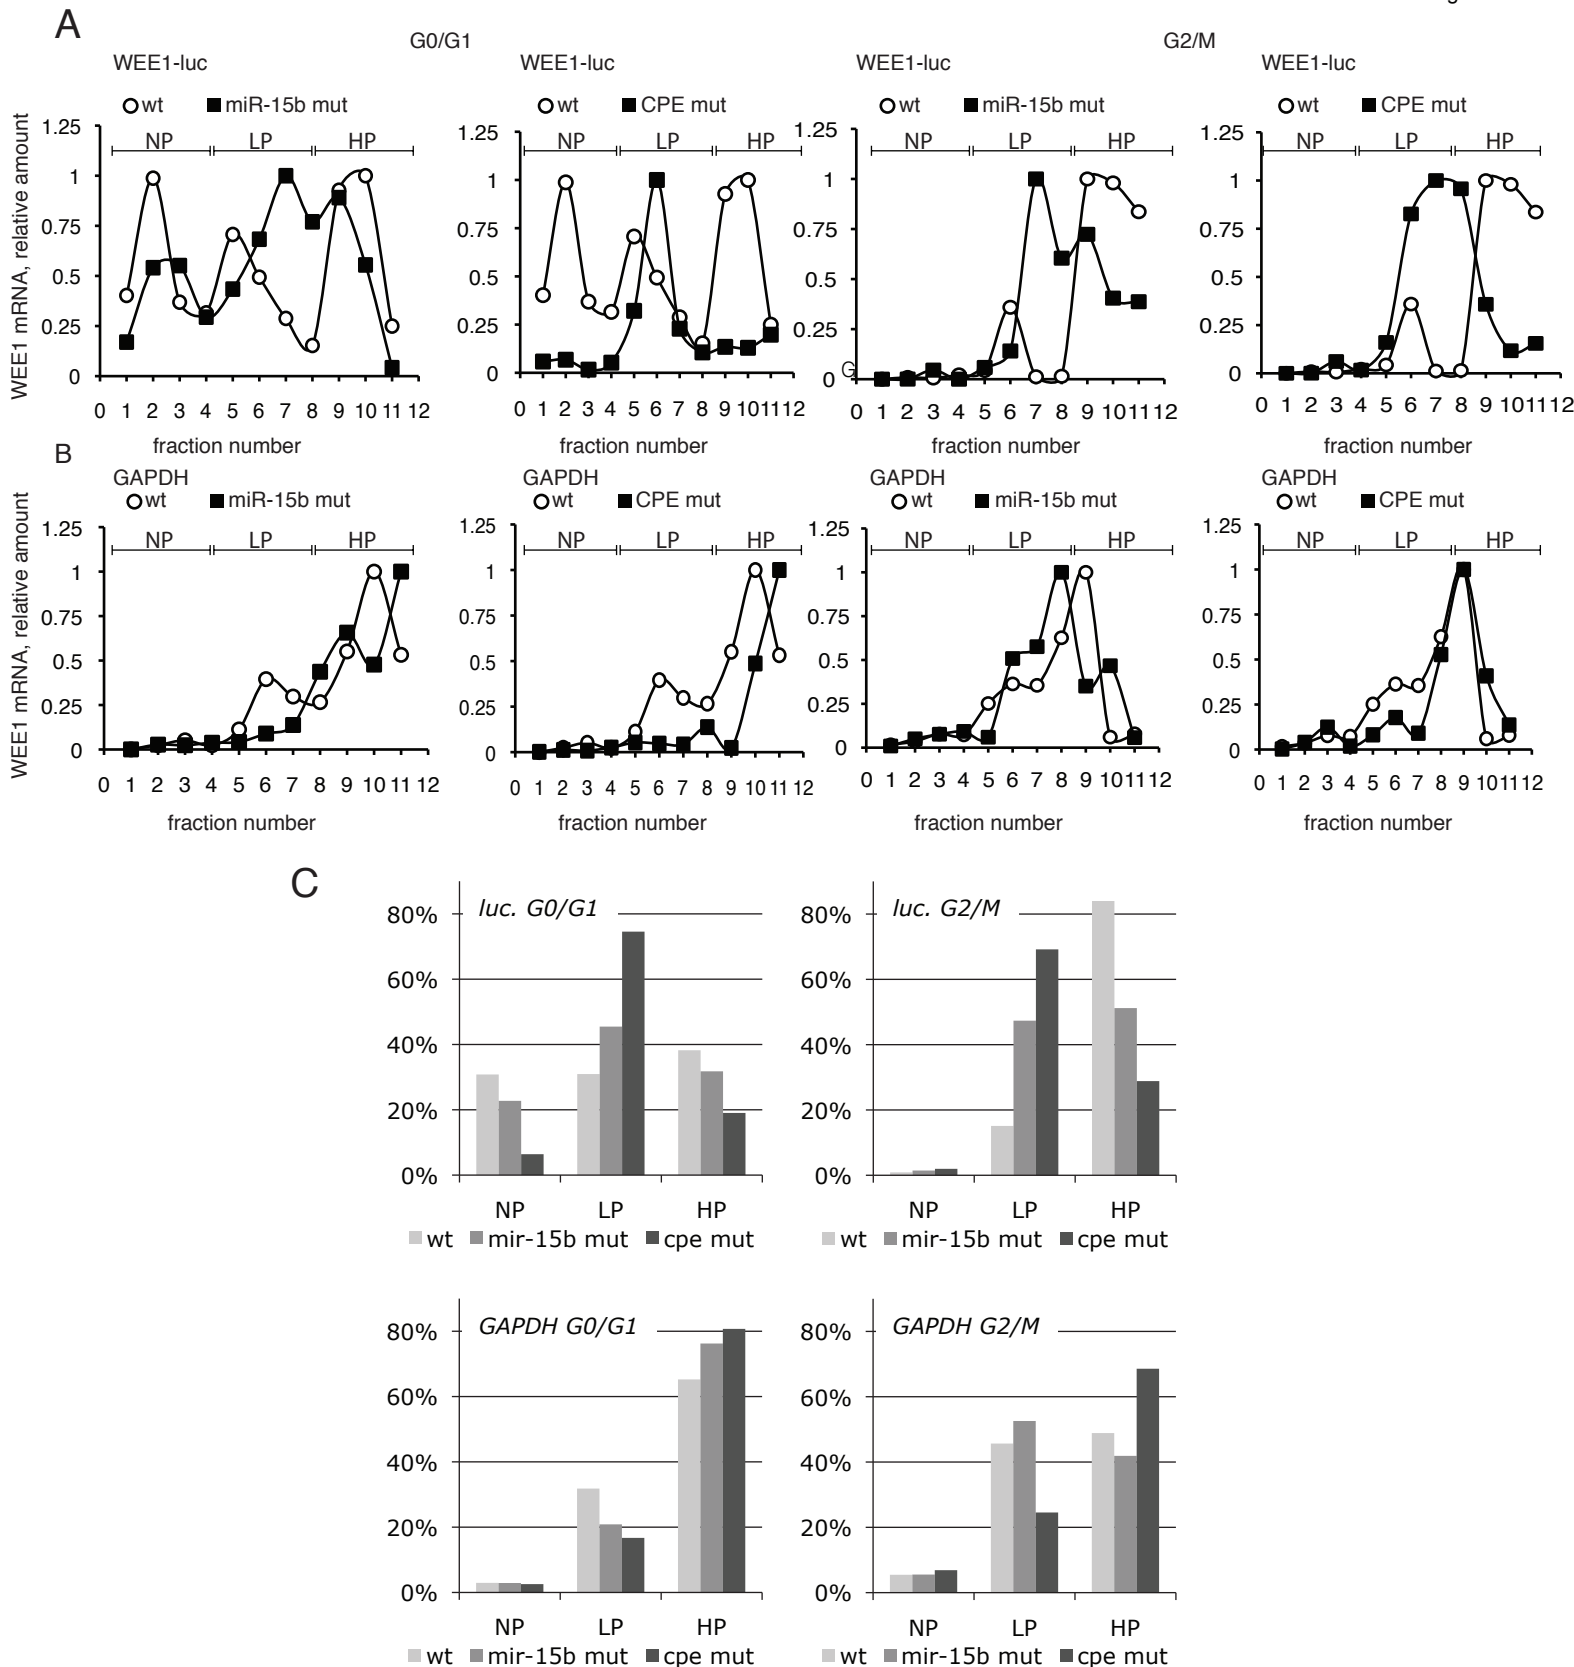

Figure S6. R-luc-WEE1 3'UTR mRNA presentation in polysomal gradient (A) Distribution of R-luc-WEE1 3'UTR mRNA with CPE or miR-15b binding site mutant in polysomal gradient during G0/G1 and G2/M phase of cell cycle. (B) Distribution of GAPDH mRNA (internal control) across the polysomal gradient during G0/G1 and G2/M phase of cell cycle. (C) WEE1 3'UTR mRNA wt and with mutations in CPE and/or miR-15b RNA in each fraction of polysomal gradient presented in % of total RNA across the gradient, NP- non polysomes, LP – Light polysomes, HP- Heavy polysomes. GAPDH mRNA distribution among the polysomal fractions in two cell-lines that have been transfected by WEE1 3'UTR reporter wt and with CPE and miR-15b sites mutations were used as control.
