# Supplementary material
Source: PubMed Central journal article supplement (PMC4845936)
Supplement: kccy-15-05-1147631-s003.pdf [file kccy-15-05-1147631-s003.pdf]

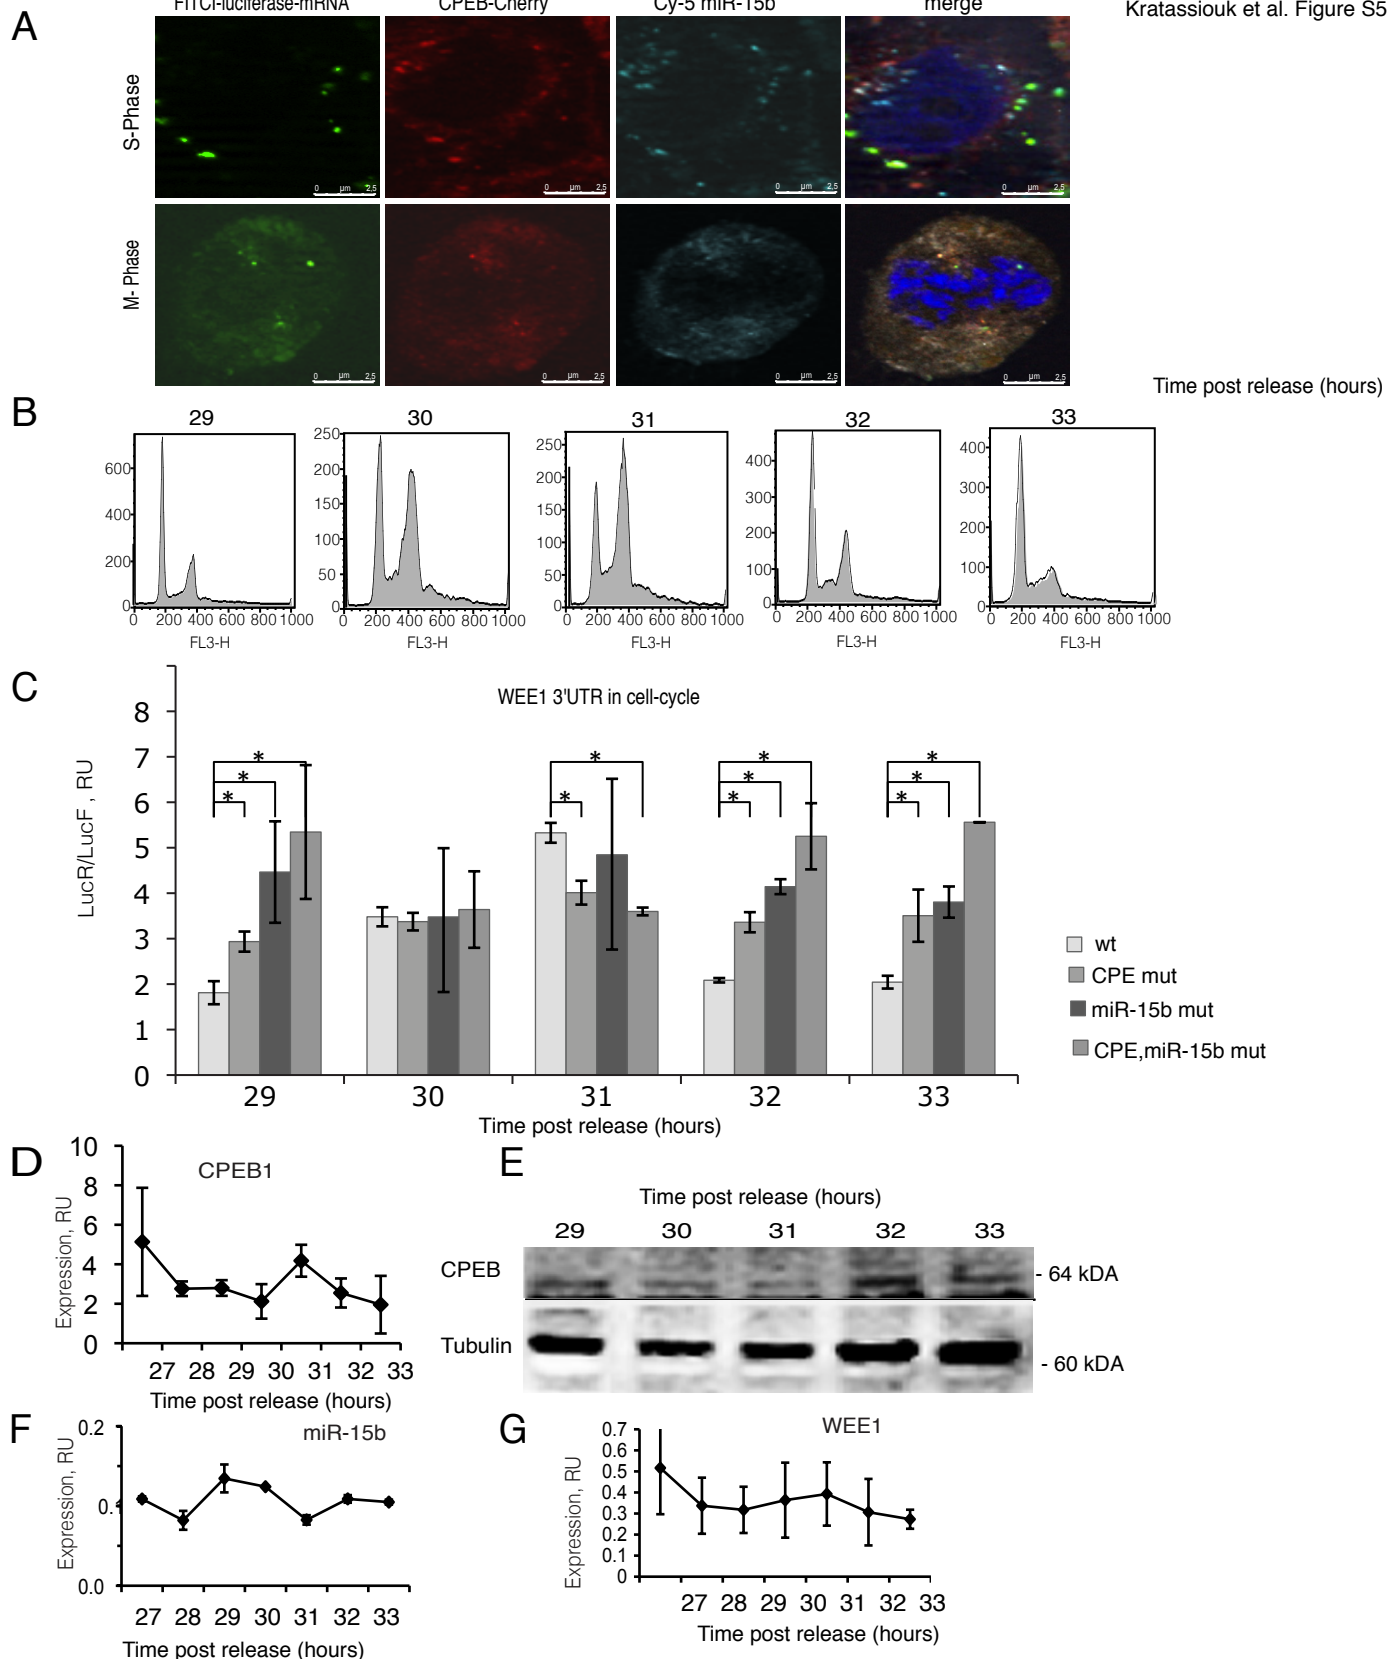

**Figure S5. MiR-15b, WEE1 and CPEB1 mRNA, protein expression and localization during cell cycle in HeLa. (A)** HeLa cells were synchronized by double thymidine block and transfected, after release, with FITC-labeled wt WEE1 3'UTR, CPEB1-Cherry, and Cy5-labeled miR-15b, incubated for 29 h, fixed, and analyzed by confocal microscopy (Leica TCS SP5 II). **(B)** FACS analyses of HeLa cells performed every hour-started 28h after release from double thymidine block. **(C)** HeLa cells were transfected with R-luc wt WEE1 3'UTR or CPE and/or miR-15b mutant reporter constructs after release from a double thymidine block. Luciferase reporter assays were carried out every hour started 28h after transfection **(D, E)**. CPEB1 mRNA and protein expression during cell cycle. QPCR and Western blot analyses of CPEB1 mRNA and protein performed at the same time points as in C; **(F)** QPCR analyses of the expression levels of miR-15b performed at the same time points as in C. **(G)** QPCR analyses of WEE1 mRNA expression.
