# Supplementary material
Source: PubMed Central journal article supplement (PMC4845936)
Supplement: kccy-15-05-1147631-s004.pdf [file kccy-15-05-1147631-s004.pdf]

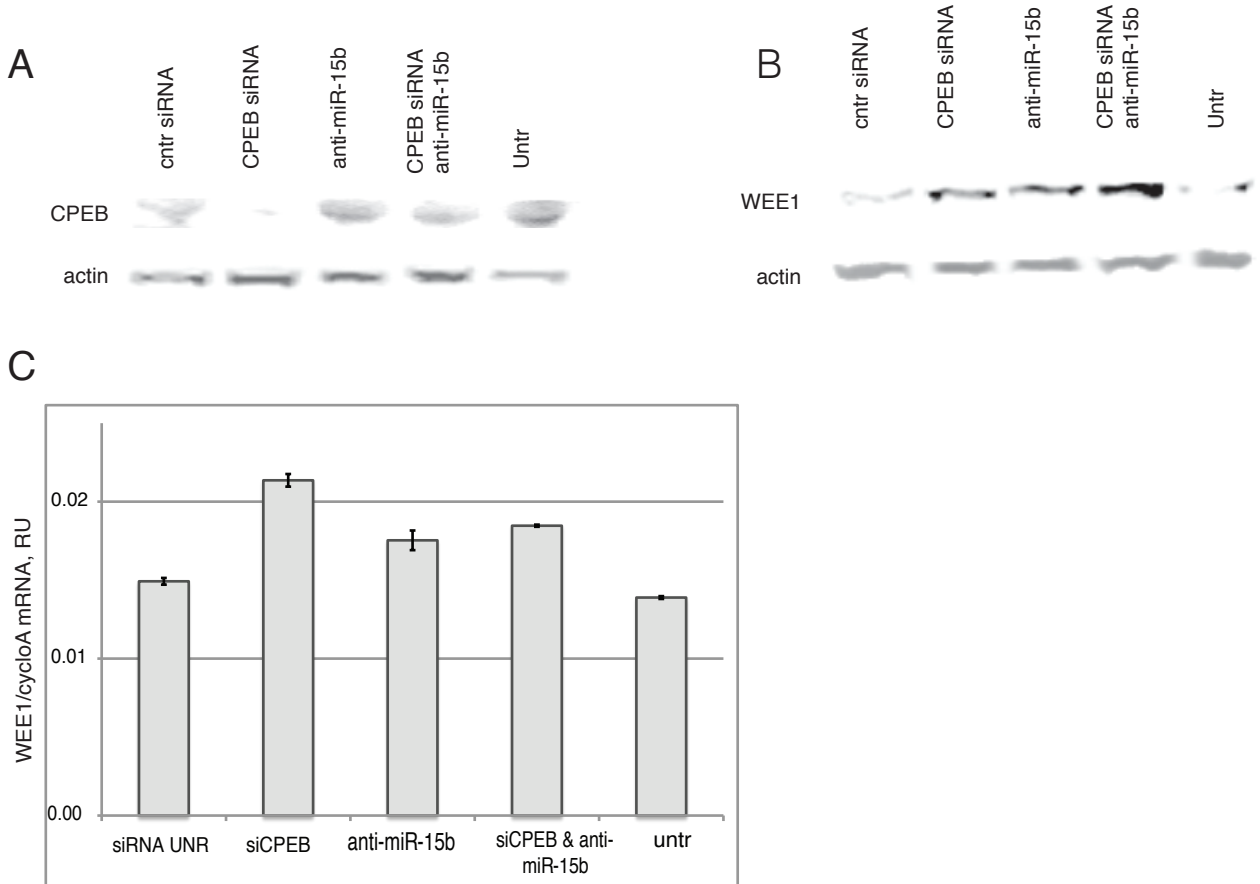

Figure S4. CPEB1 siRNA knock-down and/or miR-15b LNA down-regulation stimulate WEE1 expression.

**(A)** Depletion of CPEB1 by siRNAs. Western blot analyses of CPEB expression performed 48 h after HeLa cells were transfected with CPEB-siRNA and/or miR-15b LNA antisense probe. **(B)** CPEB1 and miR-15b control WEE1 protein expression. Western blot analyses of WEE1 expression performed 48 h after HeLa cells were transfected with CPEB1-siRNA and/or miR-15b LNA antisense probe. **(C)** CPEB1 mRNA expression is not under CPEB1 and miR-15b control. Q-PCR analyses of WEE1 mRNA accumulation in HeLa cells, performed 48 h after cells were transfected with CPEB1-siRNA and/or miR-15b LNA antisense probe.
