# Supplementary material
Source: PubMed Central journal article supplement (PMC4845936)
Supplement: kccy-15-05-1147631-s005.pdf [file kccy-15-05-1147631-s005.pdf]

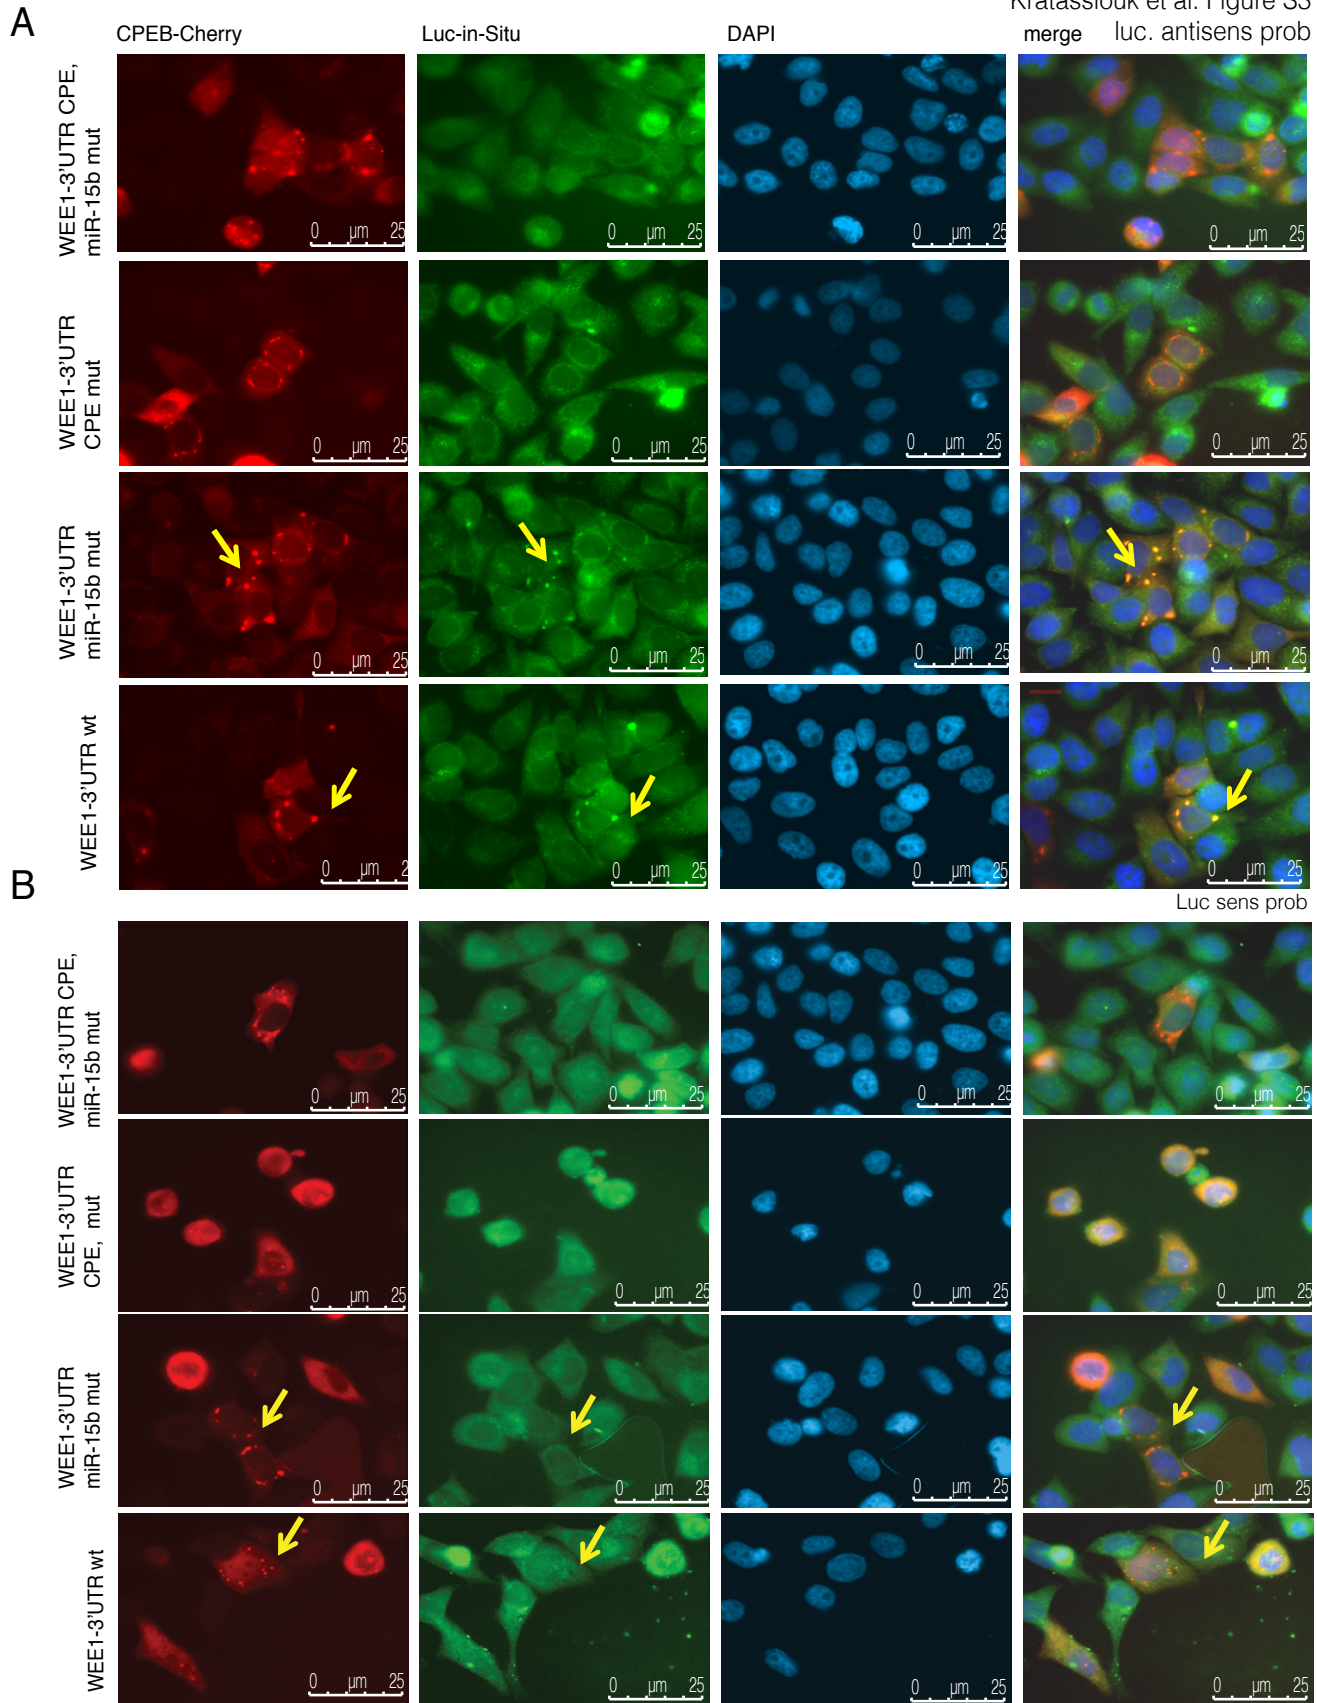

Figure S3. WEE1 3'UTR-dependent distribution of R-Luc mRNA to silencing granules in HeLa cells. (A) Cells were transfected with CPEB1-Cherry and R-Luc WEE1 3'UTR (wt or mutant as indicated) DNA constructs and, after 48h of incubation, fixed and used for in-situ hybridization with R-Luc anti-sense probe and visualized by fluorescence microscopy (Arrows point to CPEB1-granules that co-localized with WEE1 3'UTR). (B) Cells were transfected with CPEB1-Cherry and R-Luc WEE1 3'UTR constructs and treated as in (A) (R-Luc sense probe used for control). Arrows point to CPEB1-granules.
