# Supplementary material
Source: PubMed Central journal article supplement (PMC4845936)
Supplement: kccy-15-05-1147631-s006.pdf [file kccy-15-05-1147631-s006.pdf]

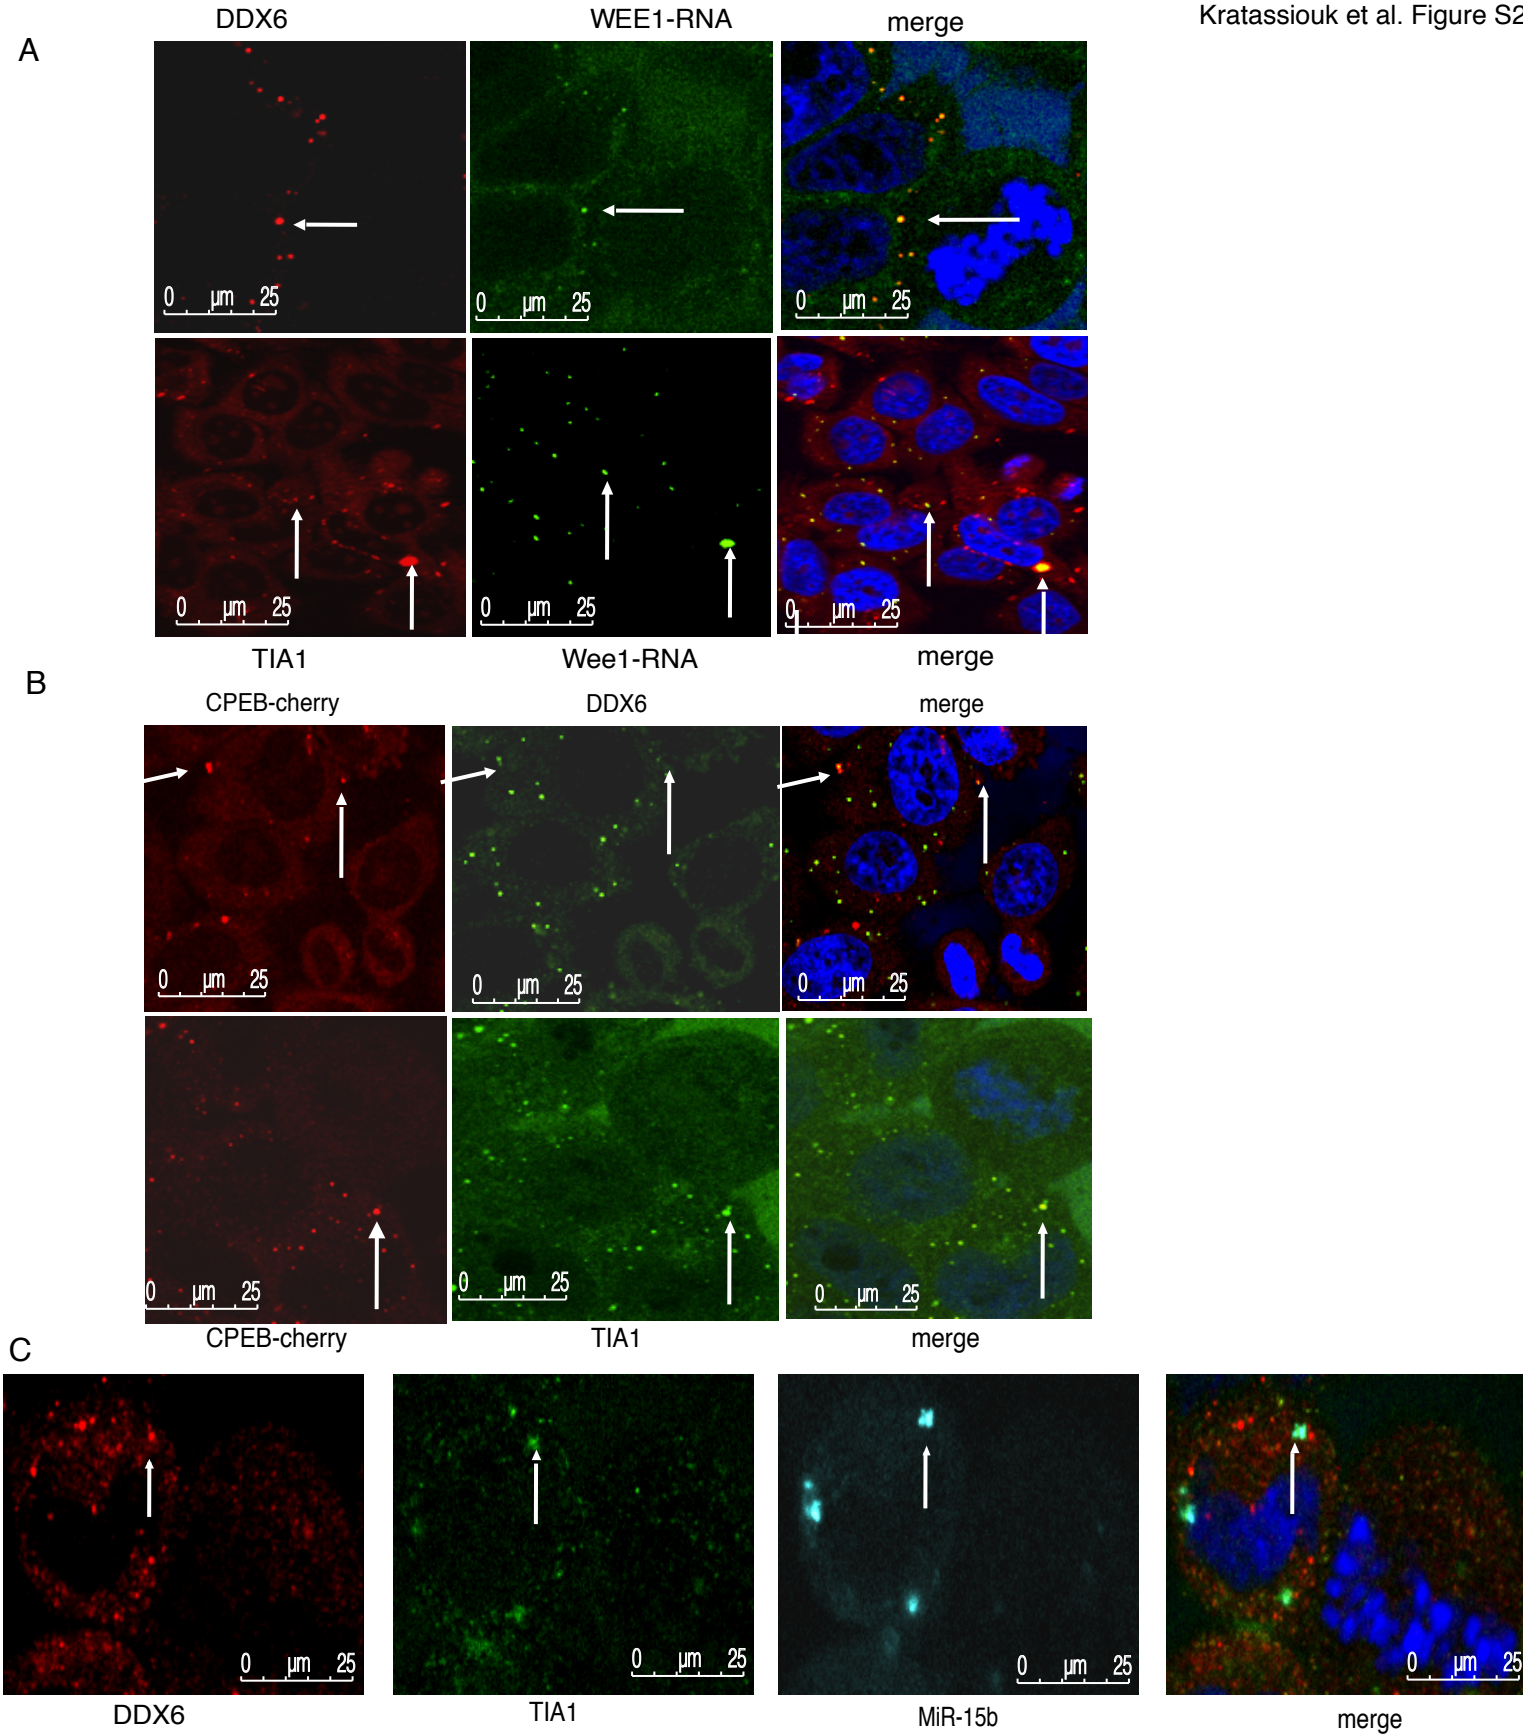

Figure S2. FITC-labeled *WEE1* RNA, Cy5 miR-15b, and CPEB1-Cherry are localized in P-bodies and stress granules. **(A)** Cells transfected with FITC-labeled *WEE1* RNA fixed 24 h later and immunostained with DDX6 (P-body marker) and TIA (stress granule marker) antibody and subjected to confocal microscopy. **(B)** Cells transfected with CPEB1-Cherry were immunostained with DDX6 and TIA antibody and subjected to confocal microscopy. **(C)** Cells transfected with Cy5-miR-15b precursor were fixed 24 h later and immunostained with DDX6 (P-body marker) and TIA (stress-granule marker) and subjected to confocal microscopy
