# Supplementary material
Source: PubMed Central journal article supplement (PMC4845936)
Supplement: kccy-15-05-1147631-s007.pdf [file kccy-15-05-1147631-s007.pdf]

**TGAG**GCTACTCCTTTCCACCTCCCCCTGAACACTGTGACAAGAGGAAGCTAGGTT  
 GAAATCACTGATAGAATCCAGTTTGCAATTACTTTCTCGATTGGTGTGAGTAGTT  
 TTACTGATTAGGACTTTTATTGTGAATTACAGTTGAAAGCTGTATTTTGATGATT  
 GCTATGTCAGGCTTTCATCTAATCTTACCAGTCTGTCTTCTGTAGGATGTGTCAC  
 TGTTGGATGTTACACCAGCCTTCCAGGGTTAA**CCACTGTGGTGGTGTGCTGCTT**  
 ATAGTTTGCTGTTGCATTGTAATAAAAGGTGTCTTCCCTGTAGTGACCTGTAAA  
 AAGTACTCAAGGGCTTTATTACAGACATAACCTCCCTTTGAAAAGGGACATGCTA  
 AAAGACTCATTACTACTCAGCCTTCAATGTACCTGTGTGTCCATCTTATATTTCT  
 TTT**TTTTTTAAT**TGTGAATTAGACTTGTATATCCCCTGGGAGCACTTTGTAGGC  
 ATTGCATGAACCATGGGATGATGATTCTGTGGAGGTATTGCCTTGTGAATTTGCT  
 GCTATTTTAGTTTTTGTCTTTGCTGTAACTTGTAGCATTAAACAATCATTTGTTGT  
 TAATAGGTCTTCTTTTTGAAACAATTATGTGAAATGTATAGCTGCTTTTGATGAA  
 AAGCAGCTATTTGCCTTTTTTTTTTTTTCTTTGAACTTTGAAGCTAGTGCATTG  
 GAAAAATGCACCCTTCCCTCCTTTGGAATGCTGTATTAATGTAGTATA**AATAAT**T  
 ACTGGTTTTGTAACTTGTCTGGTAATGTCCTTCCCGGACTCTTTTTAAATGTCT  
 CCCCCTAAGTTTTTATACTTGATTGTATTATTAGTCTGTTTTTAAATGTTTTGCC  
 CGTTTTTCTCTTCAATATTTGTGTA**TATAAA**CCGATCTTCGTGATACTGTACAT  
 AGCTGTTTGAAATGCCAGAATGACTTCTGACATTCCAAGTTTTTCACAA**AATATA**  
**TTTTAT**CTGTGATTAGCCATTTGACT**AATAAT**ACTGGCTAACAGATGTTGAAAA  
 AATTGTCTGTTTGTCTTCTCATTAATTTTGGTCTAAAACATGTTTGCACCTGTCT  
 TTGACTTGTGTTTTATTAACATTTGATTGGCAT**ATTAAA**AGTCACTCTGAGCTTAC

Figure S1. Human WEE1 3'UTR. Red color labels termination codon, purple color labels miR-15b site, yellow color labels 1st-CPE site, grey color labels potential CPE sites and green color labels potential hexonucleotide sites.
